# Supplementary material for: Genomic-Scale Interaction Involving Complementary Sequences in the Hepatitis C Virus 5′UTR Domain IIa and the RNA-Dependent RNA Polymerase Coding Region Promotes Efficient Virus Replication
Source: PubMed Central journal article supplement (PMC6357077; doi:10.3390/v11010017), 2018-12-28
Supplement: viruses-11-00017-s001.pdf [file viruses-11-00017-s001.pdf]

**Table S1. Primers used in HCV mutant construction and qPCR assays**

| Primer <sup>1</sup>            | Sequence <sup>2</sup>                                       |
|--------------------------------|-------------------------------------------------------------|
| <i>Hind</i> III-T7-5'UTR:1-19S | <b>AAGCTT</b> <u>GTAATACGACTCACTATAG</u> CCAGCCCCCGATTGGGGG |
| 5'UTR:77-110LM AS              | CTG <u>TCCACATTGGT</u> CCTAACGCCATGGCTAGAC                  |
| 5'UTR: 77-110SM AS             | CTG <u>TACCACACTCATACTA</u> ACGCCATGGCTAGAC                 |
| 5'UTR: 111-130 Linker S        | CCTCCAGGACCCCCCTCCC                                         |
| HCV Core: 825-849 AS           | GCAGATTCCTGTTGCATAGTTCAC                                    |
| NS5B 8060-8084 S               | TAAGCCAGCCCGCCTTATCGTATTC                                   |
| NS5B 8511-8546 BM AS           | GTT <u>GACCA</u> ACATGGT <u>ACAGT</u> CCTGGAGCTTCGCAGC      |
| NS5B 8511-8546 SM AS           | GTTACGAGCAT <u>GGTACAGT</u> CCTGGAGCTTCGCAGC                |
| HCV NS5b(8547-8576) linker S   | GGAGACGACCTCGTCGTTATCTGTGAAAGC                              |
| NS5B 9043-9066 AS              | TGAGGCATGAAGCCACCCTATTGA                                    |
| HCV 5'URT (130-146) S          | CGGGAGAGCCATAGTGG                                           |
| HCVUTR 272-290) AS             | AGTACCACAAGGCCTTTCG                                         |
| HCV NS5B (8374-8392) S         | TAATACGACTCACTATAGGGCTTTATATCGGGGGTCC                       |
| Hcv ns5b (8657-8676) AS        | AGTCGTATTCTGGTTGGGGC                                        |

<sup>1</sup> S, Sense; AS, Antisense.

<sup>2</sup> **AAGCTT**G, *Hind*III recognition size; GTAATACGACTCACTATAG, T7 RNA polymerase promoter; N, mutated nucleotide.

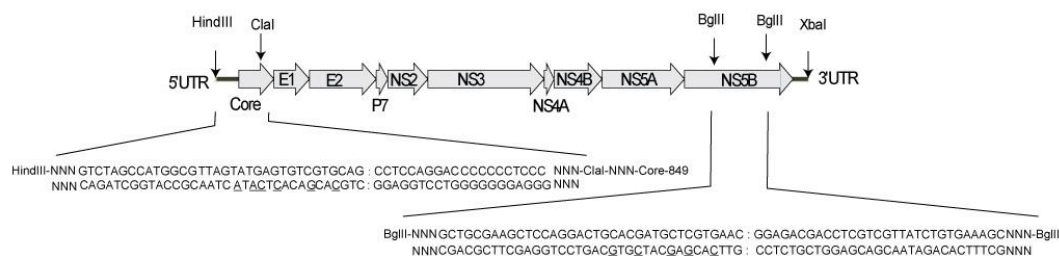

**Figure S1.** Map of HCV genome showing the *Hind* III-5'UTR-Core-*Cla*I and *Bgl*III-NS5B cloning cassettes. The nucleotides changed (N) within IRES domain II nt 95-110 and NS5B nt 8528 to 8543 and the 5' sequence of the blunt ligation partner (:) are shown and as outlined in Materials and methods, Section 2.2 Construction of HCV 1b mutant virus.

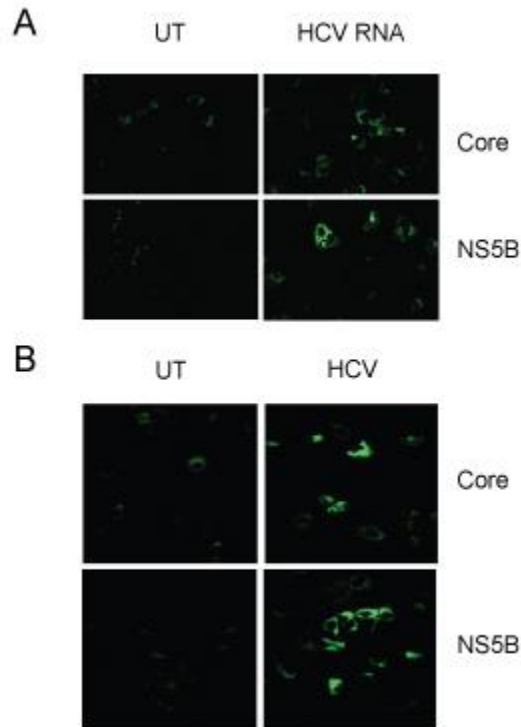

**Figure S2. HCV cell culture system.** Huh-7.5 cells were transfected or infected with full-length HCV RNA or HCV, respectively. (A) Immunofluorescence expression of HCV core antigen (top row) or NS5B antigen (bottom row) in mock-transfected (UT) or HCV 1b RNA-transfected Huh-7.5 cells as measured at 2 days post-transfection. (B) Immunofluorescence expression of HCV core antigen (top row) or NS5B antigen (bottom row) in mock-infected (UT) or HCV-infected Huh 7.5 cells as measured at 2 days post-infection.
